# Supplementary material for: Synthesis and characterization of poly-Schiff bases with a donor–acceptor structure containing thiophene units as thermoelectric materials
Source: Royal Society of Chemistry journal article supplement (doi:10.1039/c5tc00065c), 2015-01-01
Supplement: c5tc00065c1.pdf [file c5tc00065c1.pdf]

**Supporting Information for**

**Synthesis and Characterization of a Special-Structure Poly-Schiff Base  
Containing Thiophene Units as Thermoelectric Materials**

Junjie Li, Chunhua Lai, Xiongzhi Xiang, Lei Wang\*

*Shenzhen Key Laboratory of Special Functional Materials, College of Materials Science and  
Engineering, Shenzhen University, Shenzhen 518060, China*

Corresponding author: Lei Wang, Email address: [wl@szu.edu.cn](mailto:wl@szu.edu.cn)

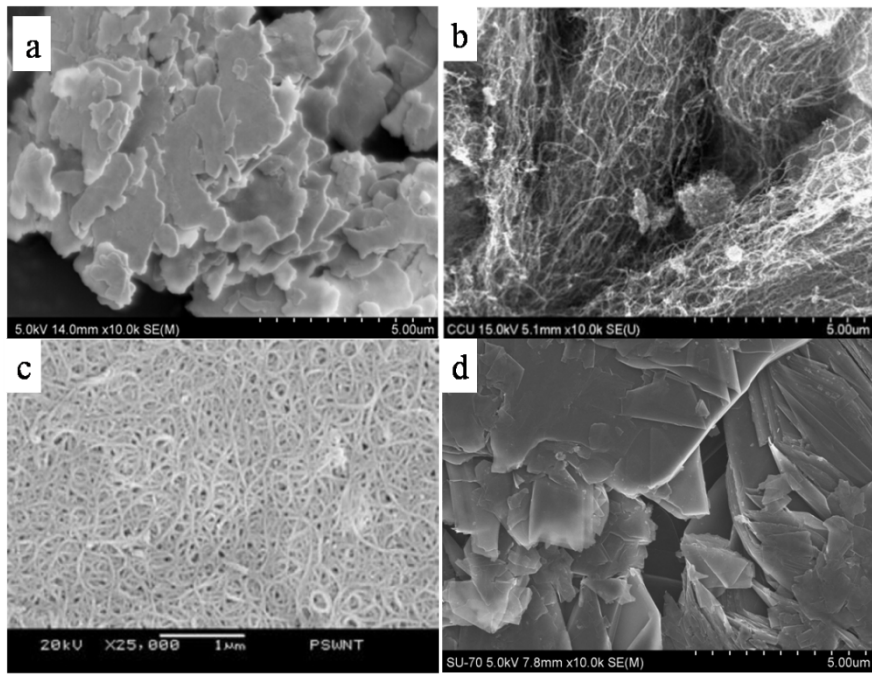

**Fig.S1.** SEM for inorganic fillers:(a)Ag, (b)MWNT, (c)SWNT, (d)G

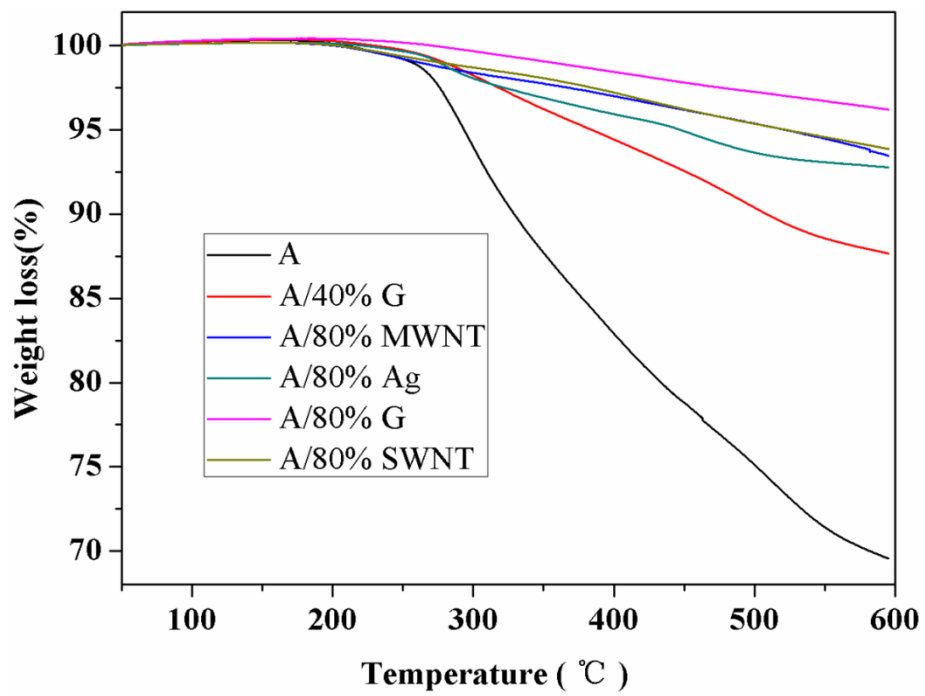

**Fig. S2** TGA curves for PSB(A) and its composites

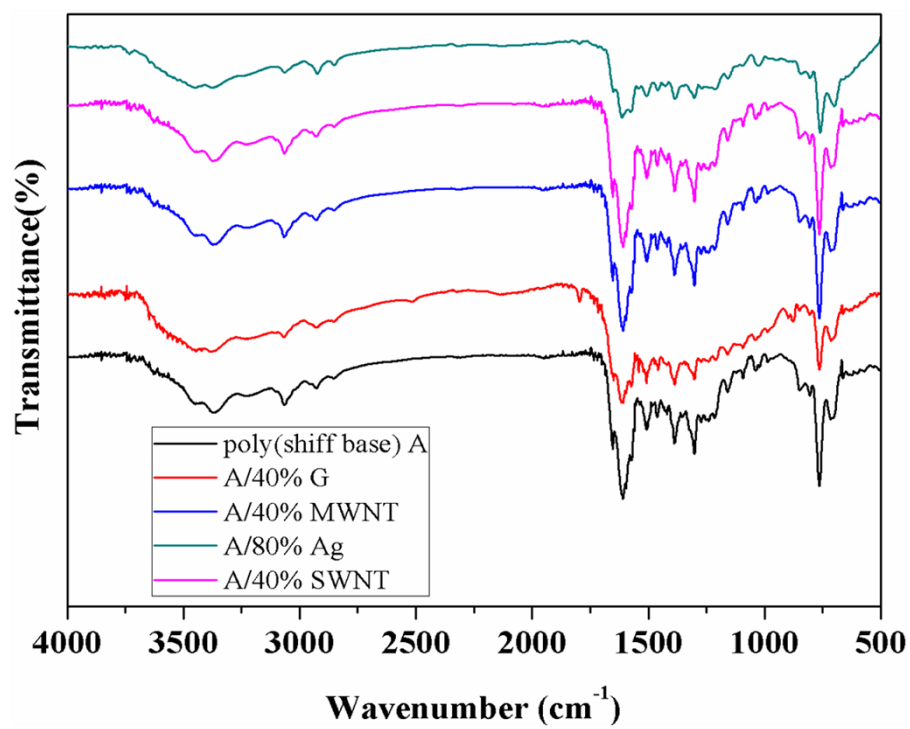

**Fig.S3** The FT-IR spectra of PSB-A and its composites
